# Supplementary material for: In Silico Research of New Therapeutics Rotenoids Derivatives against Leishmania amazonensis Infection
Source: MDPI journal article supplement (doi:10.3390/biology11010133), 2022-01-14
Supplement: s1 [file s1]

# Figure S1. SwissTargetPrediction reports of the 20 main secondary metabolites.

## SwissTargetPrediction report: 1,8-Cineol

**Reference:**  
Gleifer D., Michielin O. & Zoete V.  
*Shaping the interaction landscape of bioactive molecules*, *Bioinformatics* (2013) 29:3073-3079.

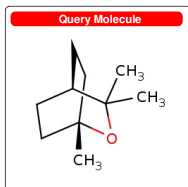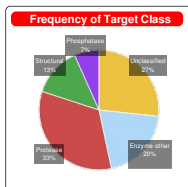

| Target                                          | Uniprot ID | Gene code | ChEMBL ID     | Probability            | # sim. cmpds (3D / 2D) | Target Class            |
|-------------------------------------------------|------------|-----------|---------------|------------------------|------------------------|-------------------------|
| Microtubule-associated protein tau              | P10636     | MAPT      | CHEMBL1293224 | <div><div></div></div> | 1 / 4                  | Unclassified            |
| Cytochrome P450 19A1                            | P11511     | CYP19A1   | CHEMBL1978    | <div><div></div></div> | 0 / 5                  | Enzyme                  |
| Desert hedgehog protein C-product (by homology) | Q43323     | DHH       |               | <div><div></div></div> | 0 / 10                 | Unclassified            |
| Indian hedgehog protein N-product (by homology) | Q14623     | IHH       |               | <div><div></div></div> | 0 / 10                 | Unclassified            |
| Sonic hedgehog protein C-product (by homology)  | Q15465     | SHH       | CHEMBL5602    | <div><div></div></div> | 0 / 10                 | Unclassified            |
| Lanosterol 14-alpha demethylase (by homology)   | Q16850     | CYP51A1   | CHEMBL3849    | <div><div></div></div> | 0 / 1                  | Enzyme                  |
| Cathepsin L1 light chain                        | P07711     | CTSL1     | CHEMBL3837    | <div><div></div></div> | 1 / 1                  | Cysteine Protease       |
| Cathepsin B                                     | P07858     | CTSB      | CHEMBL4072    | <div><div></div></div> | 1 / 1                  | Cysteine Protease       |
| Cathepsin K                                     | P43235     | CTSK      | CHEMBL268     | <div><div></div></div> | 1 / 1                  | Cysteine Protease       |
| Cathepsin L2 (by homology)                      | O60911     | CTSL2     | CHEMBL3272    | <div><div></div></div> | 1 / 1                  | Cysteine Protease       |
| Cathepsin S (by homology)                       | P25774     | CTSS      | CHEMBL2954    | <div><div></div></div> | 1 / 1                  | Cysteine Protease       |
| Dynamin-1                                       | Q05193     | DNM1      | CHEMBL4958    | <div><div></div></div> | 0 / 1                  | Structural              |
| Dynamin-2 (by homology)                         | P50570     | DNM2      | CHEMBL5812    | <div><div></div></div> | 0 / 1                  | Enzyme                  |
| Dynamin-3 (by homology)                         | Q9UQ16     | DNM3      |               | <div><div></div></div> | 0 / 1                  | Structural              |
| M-phase inducer phosphatase 1                   | P30304     | CDC25A    | CHEMBL3775    | <div><div></div></div> | 0 / 10                 | Ser_Thr_Tyr Phosphatase |

## SwissTargetPrediction report: Artocarpin

**Reference:**  
Gleifer D., Michielin O. & Zoete V.  
*Shaping the interaction landscape of bioactive molecules*, *Bioinformatics* (2013) 29:3073-3079.

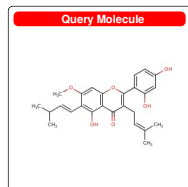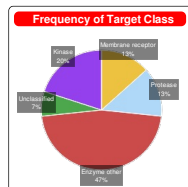

| Target                                                             | Uniprot ID | Gene code | ChEMBL ID  | Probability            | # sim. cmpds (3D / 2D) | Target Class      |
|--------------------------------------------------------------------|------------|-----------|------------|------------------------|------------------------|-------------------|
| Adenosine receptor A1 (by homology)                                | P30542     | ADORA1    | CHEMBL226  | <div><div></div></div> | 163 / 17               | Membrane receptor |
| Adenosine receptor A3                                              | P33765     | ADORA3    | CHEMBL256  | <div><div></div></div> | 106 / 15               | Membrane receptor |
| Beta-secretase 1                                                   | P56817     | BACE1     | CHEMBL4822 | <div><div></div></div> | 24 / 13                | Aspartic Protease |
| Beta-secretase 2 (by homology)                                     | Q9Y520     | BACE2     | CHEMBL2525 | <div><div></div></div> | 24 / 13                | Aspartic Protease |
| Prostaglandin G/H synthase 1                                       | P23219     | PTGS1     | CHEMBL221  | <div><div></div></div> | 24 / 7                 | Enzyme            |
| Prostaglandin G/H synthase 2                                       | P35354     | PTGS2     | CHEMBL230  | <div><div></div></div> | 24 / 7                 | Enzyme            |
| ATP-binding cassette sub-family G member 2                         | Q9UNQ0     | ABCG2     | CHEMBL5393 | <div><div></div></div> | 11 / 19                | Unclassified      |
| cGMP-specific 3',5'-cyclic phosphodiesterase                       | O76074     | PDE5A     | CHEMBL1827 | <div><div></div></div> | 79 / 8                 | Enzyme            |
| Dual 3',5'-cyclic-AMP and -GMP phosphodiesterase 11A (by homology) | Q9HCR9     | PDE11A    | CHEMBL2717 | <div><div></div></div> | 72 / 8                 | Enzyme            |
| RAC-alpha serine/threonine-protein kinase                          | P31749     | AKT1      | CHEMBL4282 | <div><div></div></div> | 128 / 2                | Ser_Thr Kinase    |
| RAC-beta serine/threonine-protein kinase                           | P31751     | AKT2      | CHEMBL2431 | <div><div></div></div> | 128 / 2                | Ser_Thr Kinase    |
| RAC-gamma serine/threonine-protein kinase                          | Q9Y243     | AKT3      | CHEMBL4816 | <div><div></div></div> | 128 / 2                | Ser_Thr Kinase    |
| Arachidonate 5-lipoxygenase                                        | P09917     | ALOX5     | CHEMBL215  | <div><div></div></div> | 43 / 45                | Enzyme            |
| Arachidonate 15-lipoxygenase (by homology)                         | P16050     | ALOX15    | CHEMBL2903 | <div><div></div></div> | 41 / 45                | Enzyme            |
| Arachidonate 12-lipoxygenase, 12S-type (by homology)               | P18054     | ALOX12    | CHEMBL3687 | <div><div></div></div> | 41 / 45                | Enzyme            |

## SwissTargetPrediction report: Artoindesinin B

**Reference:**  
Gleifer D., Michielin O. & Zoete V.  
*Shaping the interaction landscape of bioactive molecules*, *Bioinformatics* (2013) 29:3073-3079.

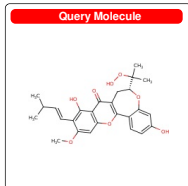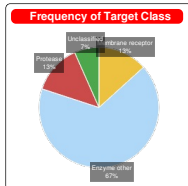

| Target                                                             | Uniprot ID | Gene code | ChEMBL ID     | Probability            | # sim. cmpds (3D / 2D) | Target Class      |
|--------------------------------------------------------------------|------------|-----------|---------------|------------------------|------------------------|-------------------|
| Adenosine receptor A1                                              | P30542     | ADORA1    | CHEMBL226     | <div><div></div></div> | 59 / 1                 | Membrane receptor |
| Adenosine receptor A3                                              | P33765     | ADORA3    | CHEMBL256     | <div><div></div></div> | 31 / 3                 | Membrane receptor |
| Prostaglandin G/H synthase 1                                       | P23219     | PTGS1     | CHEMBL221     | <div><div></div></div> | 3 / 1                  | Enzyme            |
| Prostaglandin G/H synthase 2                                       | P35354     | PTGS2     | CHEMBL230     | <div><div></div></div> | 3 / 1                  | Enzyme            |
| Beta-secretase 1                                                   | P56817     | BACE1     | CHEMBL4822    | <div><div></div></div> | 9 / 7                  | Aspartic Protease |
| Beta-secretase 2 (by homology)                                     | Q9Y520     | BACE2     | CHEMBL2525    | <div><div></div></div> | 9 / 7                  | Aspartic Protease |
| cGMP-specific 3',5'-cyclic phosphodiesterase                       | O76074     | PDE5A     | CHEMBL1827    | <div><div></div></div> | 7 / 6                  | Enzyme            |
| Dual 3',5'-cyclic-AMP and -GMP phosphodiesterase 11A (by homology) | Q9HCR9     | PDE11A    | CHEMBL2717    | <div><div></div></div> | 6 / 6                  | Enzyme            |
| Arachidonate 5-lipoxygenase                                        | P09917     | ALOX5     | CHEMBL215     | <div><div></div></div> | 6 / 33                 | Enzyme            |
| Arachidonate 15-lipoxygenase (by homology)                         | P16050     | ALOX15    | CHEMBL2903    | <div><div></div></div> | 6 / 33                 | Enzyme            |
| Arachidonate 15-lipoxygenase B (by homology)                       | O15296     | ALOX15B   | CHEMBL2457    | <div><div></div></div> | 6 / 33                 | Enzyme            |
| Arachidonate 12-lipoxygenase, 12R-type (by homology)               | O75342     | ALOX12B   |               | <div><div></div></div> | 4 / 33                 | Enzyme            |
| Arachidonate 12-lipoxygenase, 12S-type (by homology)               | P18054     | ALOX12    | CHEMBL3687    | <div><div></div></div> | 6 / 33                 | Enzyme            |
| Epidermis-type lipoxygenase 3 (by homology)                        | Q9BYJ1     | ALOXE3    |               | <div><div></div></div> | 6 / 33                 | Enzyme            |
| Microtubule-associated protein tau                                 | P10636     | MAPT      | CHEMBL1293224 | <div><div></div></div> | 72 / 2                 | Unclassified      |

## SwissTargetPrediction report: Artonin E

**Reference:**  
Gleifer D., Michielin O. & Zoete V.  
*Shaping the interaction landscape of bioactive molecules*, *Bioinformatics* (2013) 29:3073-3079.

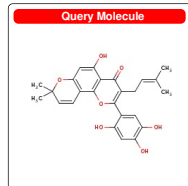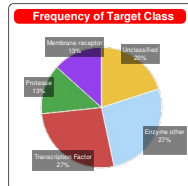

| Target                                               | Uniprot ID | Gene code | ChEMBL ID     | Probability            | # sim. cmpds (3D / 2D) | Target Class         |
|------------------------------------------------------|------------|-----------|---------------|------------------------|------------------------|----------------------|
| ATP-binding cassette sub-family G member 2           | Q9UNQ0     | ABCG2     | CHEMBL5393    | <div><div></div></div> | 13 / 2                 | Unclassified         |
| Prostaglandin G/H synthase 1 (by homology)           | P23219     | PTGS1     | CHEMBL221     | <div><div></div></div> | 13 / 1                 | Enzyme               |
| Prostaglandin G/H synthase 2                         | P35354     | PTGS2     | CHEMBL230     | <div><div></div></div> | 13 / 1                 | Enzyme               |
| Nuclear factor NF-kappa-B p50 subunit                | P19838     | NFKB1     | CHEMBL3251    | <div><div></div></div> | 2 / 1                  | Transcription Factor |
| Transcription factor p65                             | Q04206     | RELA      | CHEMBL5533    | <div><div></div></div> | 1 / 2                  | Transcription Factor |
| Nuclear factor NF-kappa-B p100 subunit (by homology) | Q00653     | NFKB2     | CHEMBL3003    | <div><div></div></div> | 2 / 1                  | Transcription Factor |
| Proto-oncogene c-Rel (by homology)                   | Q04864     | REL       |               | <div><div></div></div> | 1 / 2                  | Transcription Factor |
| Beta-secretase 1                                     | P56817     | BACE1     | CHEMBL4822    | <div><div></div></div> | 15 / 2                 | Aspartic Protease    |
| Beta-secretase 2 (by homology)                       | Q9Y520     | BACE2     | CHEMBL2525    | <div><div></div></div> | 15 / 2                 | Aspartic Protease    |
| Adenosine receptor A1                                | P30542     | ADORA1    | CHEMBL226     | <div><div></div></div> | 47 / 1                 | Membrane receptor    |
| Adenosine receptor A3                                | P33765     | ADORA3    | CHEMBL256     | <div><div></div></div> | 17 / 3                 | Membrane receptor    |
| Scavenger receptor class B member 1 (by homology)    | Q8WTY0     | SCARB1    | CHEMBL1914272 | <div><div></div></div> | 1 / 1                  | Unclassified         |
| Microtubule-associated protein tau                   | P10636     | MAPT      | CHEMBL1293224 | <div><div></div></div> | 203 / 5                | Unclassified         |
| Arachidonate 5-lipoxygenase                          | P09917     | ALOX5     | CHEMBL215     | <div><div></div></div> | 46 / 39                | Enzyme               |
| Arachidonate 15-lipoxygenase (by homology)           | P16050     | ALOX15    | CHEMBL2903    | <div><div></div></div> | 47 / 39                | Enzyme               |

SwissTargetPrediction report: Artotonin V

Reference:  
Gleifer D., Michielin O. & Zoete V.  
Shaping the interaction landscape of  
bioactive molecules, *Bioinformatics*  
(2013) 29:3073-3079.

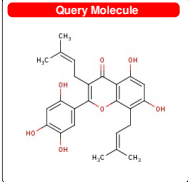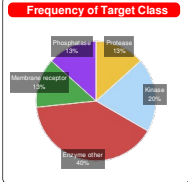

| Target                                                             | Uniprot ID | Gene code | ChEMBL ID  | Probability            | # sim. cmpds (3D / 2D) | Target Class      |
|--------------------------------------------------------------------|------------|-----------|------------|------------------------|------------------------|-------------------|
| Beta-secretase 1                                                   | P56817     | BACE1     | CHEMBL4822 | <div><div></div></div> | 8 / 12                 | Aspartic Protease |
| Beta-secretase 2 (by homology)                                     | Q9Y5Z0     | BACE2     | CHEMBL2525 | <div><div></div></div> | 8 / 12                 | Aspartic Protease |
| RAC-alpha serine/threonine-protein kinase                          | P31749     | AKT1      | CHEMBL4282 | <div><div></div></div> | 110 / 2                | Ser_Thr Kinase    |
| RAC-beta serine/threonine-protein kinase (by homology)             | P31751     | AKT2      | CHEMBL2431 | <div><div></div></div> | 110 / 2                | Ser_Thr Kinase    |
| RAC-gamma serine/threonine-protein kinase (by homology)            | Q9Y243     | AKT3      | CHEMBL4816 | <div><div></div></div> | 110 / 2                | Ser_Thr Kinase    |
| cGMP-specific 3',5'-cyclic phosphodiesterase                       | Q76074     | PDE5A     | CHEMBL1827 | <div><div></div></div> | 60 / 7                 | Enzyme            |
| Dual 3',5'-cyclic-AMP and -GMP phosphodiesterase 11A (by homology) | Q9HCR9     | PDE11A    | CHEMBL2717 | <div><div></div></div> | 56 / 7                 | Enzyme            |
| Adenosine receptor A3                                              | P33765     | ADORA3    | CHEMBL256  | <div><div></div></div> | 13 / 15                | Membrane receptor |
| Tyrosine-protein phosphatase non-receptor type 1                   | P18031     | PTPN1     | CHEMBL335  | <div><div></div></div> | 8 / 13                 | Tyr Phosphatase   |
| Tyrosine-protein phosphatase non-receptor type 2 (by homology)     | P17706     | PTPN2     | CHEMBL3807 | <div><div></div></div> | 8 / 13                 | Tyr Phosphatase   |
| Adenosine receptor A1 (by homology)                                | P30542     | ADORA1    | CHEMBL226  | <div><div></div></div> | 29 / 18                | Membrane receptor |
| Cytochrome P450 19A1                                               | P11511     | CYP19A1   | CHEMBL1978 | <div><div></div></div> | 11 / 13                | Enzyme            |
| Arachidonate 5-lipoxygenase                                        | P09917     | ALOX5     | CHEMBL215  | <div><div></div></div> | 55 / 46                | Enzyme            |
| Arachidonate 15-lipoxygenase (by homology)                         | P16050     | ALOX15    | CHEMBL2903 | <div><div></div></div> | 55 / 46                | Enzyme            |
| Arachidonate 12-lipoxygenase, 12S-type (by homology)               | P18054     | ALOX12    | CHEMBL3687 | <div><div></div></div> | 55 / 46                | Enzyme            |

SwissTargetPrediction report: Artotonol B

Reference:  
Gleifer D., Michielin O. & Zoete V.  
Shaping the interaction landscape of  
bioactive molecules, *Bioinformatics*  
(2013) 29:3073-3079.

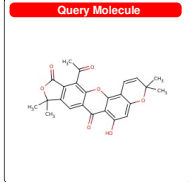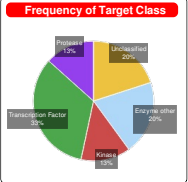

| Target                                                                      | Uniprot ID | Gene code | ChEMBL ID     | Probability            | # sim. cmpds (3D / 2D) | Target Class         |
|-----------------------------------------------------------------------------|------------|-----------|---------------|------------------------|------------------------|----------------------|
| ATP-binding cassette sub-family G member 2                                  | Q9UNQ0     | ABCG2     | CHEMBL5393    | <div><div></div></div> | 11 / 1                 | Unclassified         |
| Microtubule-associated protein tau                                          | P10636     | MAPT      | CHEMBL1293224 | <div><div></div></div> | 604 / 3                | Unclassified         |
| Scavenger receptor class B member 1 (by homology)                           | Q8WTV0     | SCARB1    | CHEMBL1914272 | <div><div></div></div> | 2 / 1                  | Unclassified         |
| Prostaglandin G/H synthase 1 (by homology)                                  | P23219     | PTGS1     | CHEMBL221     | <div><div></div></div> | 28 / 2                 | Enzyme               |
| Prostaglandin G/H synthase 2                                                | P35354     | PTGS2     | CHEMBL230     | <div><div></div></div> | 28 / 2                 | Enzyme               |
| Dual specificity tyrosine-phosphorylation-regulated kinase 1A (by homology) | Q13627     | DYRK1A    | CHEMBL2292    | <div><div></div></div> | 22 / 1                 | Ser_Thr_Tyr Kinase   |
| Tyrosyl-DNA phosphodiesterase 1                                             | Q9NUW8     | TDP1      | CHEMBL1075138 | <div><div></div></div> | 153 / 1                | Enzyme               |
| Nuclear factor NF-kappa-B p50 subunit                                       | P19838     | NFKB1     | CHEMBL3251    | <div><div></div></div> | 1 / 1                  | Transcription Factor |
| Nuclear factor NF-kappa-B p100 subunit (by homology)                        | Q00653     | NFKB2     | CHEMBL3003    | <div><div></div></div> | 1 / 1                  | Transcription Factor |
| Beta-secretase 1                                                            | P56817     | BACE1     | CHEMBL4822    | <div><div></div></div> | 4 / 1                  | Aspartic Protease    |
| Beta-secretase 2 (by homology)                                              | Q9Y5Z0     | BACE2     | CHEMBL2525    | <div><div></div></div> | 4 / 1                  | Aspartic Protease    |
| Peroxisome proliferator-activated receptor gamma                            | P37231     | PPARG     | CHEMBL235     | <div><div></div></div> | 2 / 3                  | Transcription Factor |
| Peroxisome proliferator-activated receptor alpha                            | Q07869     | PPARA     | CHEMBL239     | <div><div></div></div> | 2 / 3                  | Transcription Factor |
| Peroxisome proliferator-activated receptor delta (by homology)              | Q03181     | PPARD     | CHEMBL3979    | <div><div></div></div> | 2 / 3                  | Transcription Factor |
| Protein kinase C gamma type (by homology)                                   | P05129     | PRKCG     | CHEMBL2938    | <div><div></div></div> | 22 / 1                 | Ser_Thr Kinase       |

SwissTargetPrediction report: Bicyclogermacrene

Reference:  
Gleifer D., Michielin O. & Zoete V.  
Shaping the interaction landscape of  
bioactive molecules, *Bioinformatics*  
(2013) 29:3073-3079.

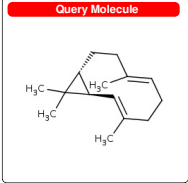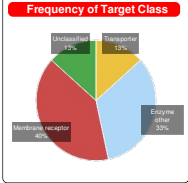

| Target                                              | Uniprot ID | Gene code | ChEMBL ID     | Probability            | # sim. cmpds (3D / 2D) | Target Class      |
|-----------------------------------------------------|------------|-----------|---------------|------------------------|------------------------|-------------------|
| Sodium-dependent noradrenaline transporter          | P23975     | SLC6A2    | CHEMBL222     | <div><div></div></div> | 4 / 1                  | Transporter       |
| Sodium-dependent dopamine transporter (by homology) | Q01959     | SLC6A3    | CHEMBL238     | <div><div></div></div> | 4 / 1                  | Transporter       |
| Squalene monooxygenase (by homology)                | Q14534     | SQLE      | CHEMBL3592    | <div><div></div></div> | 0 / 8                  | Enzyme            |
| Tyrosyl-DNA phosphodiesterase 1                     | Q9NUW8     | TDP1      | CHEMBL1075138 | <div><div></div></div> | 1 / 4                  | Enzyme            |
| Muscarinic acetylcholine receptor M2                | P08172     | CHRM2     | CHEMBL211     | <div><div></div></div> | 1 / 1                  | Membrane receptor |
| Muscarinic acetylcholine receptor M4                | P08173     | CHRM4     | CHEMBL1821    | <div><div></div></div> | 1 / 1                  | Membrane receptor |
| Muscarinic acetylcholine receptor M5                | P08912     | CHRM5     | CHEMBL2035    | <div><div></div></div> | 1 / 1                  | Membrane receptor |
| Muscarinic acetylcholine receptor M1                | P11229     | CHRM1     | CHEMBL216     | <div><div></div></div> | 1 / 1                  | Membrane receptor |
| Muscarinic acetylcholine receptor M3                | P20309     | CHRM3     | CHEMBL245     | <div><div></div></div> | 1 / 1                  | Membrane receptor |
| Sigma non-opioid intracellular receptor 1           | Q99720     | SIGMAR1   | CHEMBL287     | <div><div></div></div> | 12 / 1                 | Membrane receptor |
| Cytochrome P450 19A1                                | P11511     | CYP19A1   | CHEMBL1978    | <div><div></div></div> | 1 / 57                 | Enzyme            |
| Acetylcholinesterase                                | P22303     | ACHE      | CHEMBL220     | <div><div></div></div> | 1 / 1                  | Enzyme            |
| Cholinesterase (by homology)                        | P06276     | BCHE      | CHEMBL1914    | <div><div></div></div> | 1 / 1                  | Enzyme            |
| Microtubule-associated protein tau                  | P10636     | MAPT      | CHEMBL1293224 | <div><div></div></div> | 1 / 2                  | Unclassified      |
| Muscleblind-like protein 1                          | Q9NR56     | MBNL1     | CHEMBL1293317 | <div><div></div></div> | 3 / 1                  | Unclassified      |

SwissTargetPrediction report: Brunfelsamidin

Reference:  
Gleifer D., Michielin O. & Zoete V.  
Shaping the interaction landscape of  
bioactive molecules, *Bioinformatics*  
(2013) 29:3073-3079.

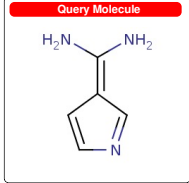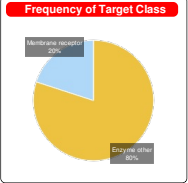

| Target                                             | Uniprot ID | Gene code | ChEMBL ID  | Probability            | # sim. cmpds (3D / 2D) | Target Class      |
|----------------------------------------------------|------------|-----------|------------|------------------------|------------------------|-------------------|
| Carbonic anhydrase 12                              | O43570     | CA12      | CHEMBL3242 | <div><div></div></div> | 2 / 0                  | Enzyme            |
| Carbonic anhydrase 1                               | P00915     | CA1       | CHEMBL261  | <div><div></div></div> | 2 / 0                  | Enzyme            |
| Carbonic anhydrase 2                               | P00918     | CA2       | CHEMBL205  | <div><div></div></div> | 2 / 0                  | Enzyme            |
| Carbonic anhydrase 9                               | Q16790     | CA9       | CHEMBL3594 | <div><div></div></div> | 2 / 0                  | Enzyme            |
| Carbonic anhydrase 14 (by homology)                | Q9ULX7     | CA14      | CHEMBL3510 | <div><div></div></div> | 2 / 0                  | Enzyme            |
| Carbonic anhydrase 3 (by homology)                 | P07451     | CA3       | CHEMBL2885 | <div><div></div></div> | 2 / 0                  | Enzyme            |
| Carbonic anhydrase 5A, mitochondrial (by homology) | P35218     | CAS5A     | CHEMBL4789 | <div><div></div></div> | 2 / 0                  | Enzyme            |
| Carbonic anhydrase 7 (by homology)                 | P43166     | CA7       | CHEMBL2326 | <div><div></div></div> | 2 / 0                  | Enzyme            |
| Carbonic anhydrase 13 (by homology)                | Q8N1Q1     | CA13      | CHEMBL3912 | <div><div></div></div> | 2 / 0                  | Enzyme            |
| Carbonic anhydrase 5B, mitochondrial (by homology) | Q9Y2D0     | CAS5B     | CHEMBL3969 | <div><div></div></div> | 2 / 0                  | Enzyme            |
| Adenosine receptor A2a                             | P29274     | ADORA2A   | CHEMBL251  | <div><div></div></div> | 6 / 0                  | Membrane receptor |
| Adenosine receptor A1 (by homology)                | P30542     | ADORA1    | CHEMBL226  | <div><div></div></div> | 6 / 0                  | Membrane receptor |
| Adenosine receptor A2b (by homology)               | P29275     | ADORA2B   | CHEMBL255  | <div><div></div></div> | 6 / 0                  | Membrane receptor |
| Nitric oxide synthase, endothelial                 | P29474     | NOS3      | CHEMBL4803 | <div><div></div></div> | 3 / 0                  | Enzyme            |
| Nitric oxide synthase, brain (by homology)         | P29475     | NOS1      | CHEMBL3568 | <div><div></div></div> | 3 / 0                  | Enzyme            |

SwissTargetPrediction report: 2,4-trans-4,5-trans-4,5-dihydroxypipecolic acid

Reference:  
Gleffler D., Michielin O. & Zoete V.  
Shaping the interaction landscape of  
bioactive molecules, *Bioinformatics*  
(2013) 29:3073-3079.

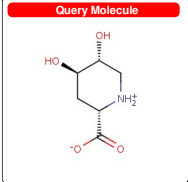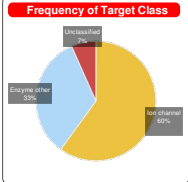

| Target                                                 | Uniprot ID | Gene code | ChEMBL ID     | Probability            | # sim. cmpds (3D / 2D) | Target Class |
|--------------------------------------------------------|------------|-----------|---------------|------------------------|------------------------|--------------|
| Glutamate receptor ionotropic, kainate 1 (by homology) | P39086     | GRIK1     | CHEMBL1918    | <div><div></div></div> | 7 / 11                 | Ion channel  |
| Glutamate receptor ionotropic, kainate 2 (by homology) | Q13002     | GRIK2     | CHEMBL3683    | <div><div></div></div> | 7 / 11                 | Ion channel  |
| Glutamate receptor ionotropic, kainate 3 (by homology) | Q13003     | GRIK3     | CHEMBL3684    | <div><div></div></div> | 7 / 11                 | Ion channel  |
| Glucosylase                                            | O43451     | MGAM      | CHEMBL2074    | <div><div></div></div> | 1 / 39                 | Enzyme       |
| Lysosomal alpha-glucosidase                            | P10253     | GAA       | CHEMBL2608    | <div><div></div></div> | 1 / 18                 | Enzyme       |
| Sucrase                                                | P14410     | SI        | CHEMBL2748    | <div><div></div></div> | 1 / 39                 | Enzyme       |
| Glucosylceramidase                                     | P04062     | GBA       | CHEMBL2179    | <div><div></div></div> | 1 / 47                 | Enzyme       |
| Glutamate receptor 1                                   | P42261     | GRIA1     | CHEMBL2009    | <div><div></div></div> | 10 / 2                 | Ion channel  |
| Glutamate receptor 2                                   | P42262     | GRIA2     | CHEMBL4016    | <div><div></div></div> | 10 / 2                 | Ion channel  |
| Glutamate receptor 3 (by homology)                     | P42263     | GRIA3     | CHEMBL3595    | <div><div></div></div> | 10 / 2                 | Ion channel  |
| Glutamate receptor 4                                   | P48058     | GRIA4     | CHEMBL3190    | <div><div></div></div> | 10 / 2                 | Ion channel  |
| Microtubule-associated protein tau                     | P10636     | MAPT      | CHEMBL1293224 | <div><div></div></div> | 2 / 5                  | Unclassified |
| Glutamate receptor ionotropic, kainate 5               | Q16478     | GRIK5     | CHEMBL2675    | <div><div></div></div> | 2 / 2                  | Ion channel  |
| Glutamate receptor ionotropic, kainate 4 (by homology) | Q16099     | GRIK4     | CHEMBL2829    | <div><div></div></div> | 2 / 2                  | Ion channel  |
| Tissue alpha-L-fucosidase                              | P04066     | FUCA1     | CHEMBL4176    | <div><div></div></div> | 0 / 37                 | Enzyme       |

SwissTargetPrediction report: Chaplalin

Reference:  
Gleffler D., Michielin O. & Zoete V.  
Shaping the interaction landscape of  
bioactive molecules, *Bioinformatics*  
(2013) 29:3073-3079.

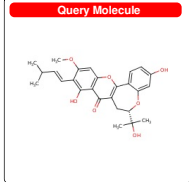

SwissTargetPrediction report: Cycloartobiloxantone

Reference:  
Gleifer D., Michielin O. & Zoete V.  
Shaping the interaction landscape of  
bioactive molecules, *Bioinformatics*  
(2013) 29:3073-3079.

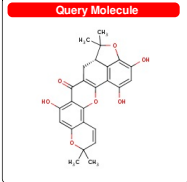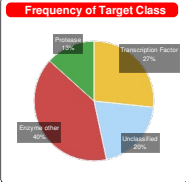

| Target                                               | Uniprot ID | Gene code | ChEMBL ID     | Probability            | # sim. cmpds (3D / 2D) | Target Class         |
|------------------------------------------------------|------------|-----------|---------------|------------------------|------------------------|----------------------|
| Nuclear factor NF-kappa-B p50 subunit                | P19838     | NFKB1     | CHEMBL3251    | <div><div></div></div> | 1 / 1                  | Transcription Factor |
| Transcription factor p65                             | Q04206     | RELA      | CHEMBL5533    | <div><div></div></div> | 1 / 2                  | Transcription Factor |
| Nuclear factor NF-kappa-B p100 subunit (by homology) | Q00653     | NFKB2     | CHEMBL3003    | <div><div></div></div> | 1 / 1                  | Transcription Factor |
| Proto-oncogene c-Rel (by homology)                   | Q04864     | REL       |               | <div><div></div></div> | 1 / 2                  | Transcription Factor |
| ATP-binding cassette sub-family G member 2           | Q9UNQ0     | ABCG2     | CHEMBL5393    | <div><div></div></div> | 9 / 1                  | Unclassified         |
| Prostaglandin G/H synthase 1 (by homology)           | P23219     | PTGS1     | CHEMBL221     | <div><div></div></div> | 4 / 1                  | Enzyme               |
| Prostaglandin G/H synthase 2                         | P35354     | PTGS2     | CHEMBL230     | <div><div></div></div> | 4 / 1                  | Enzyme               |
| Beta-secretase 1                                     | P56817     | BACE1     | CHEMBL4822    | <div><div></div></div> | 8 / 1                  | Aspartic Protease    |
| Beta-secretase 2 (by homology)                       | Q9Y520     | BACE2     | CHEMBL2525    | <div><div></div></div> | 8 / 1                  | Aspartic Protease    |
| Microtubule-associated protein tau                   | P10636     | MAPT      | CHEMBL1293224 | <div><div></div></div> | 123 / 3                | Unclassified         |
| Scavenger receptor class B member 1 (by homology)    | Q8WTV0     | SCARB1    | CHEMBL1914272 | <div><div></div></div> | 1 / 1                  | Unclassified         |
| Arachidonate 5-lipoxygenase                          | P09917     | ALOX5     | CHEMBL215     | <div><div></div></div> | 22 / 28                | Enzyme               |
| Arachidonate 15-lipoxygenase (by homology)           | P16050     | ALOX15    | CHEMBL2903    | <div><div></div></div> | 22 / 28                | Enzyme               |
| Arachidonate 12-lipoxygenase, 12S-type (by homology) | P18054     | ALOX12    | CHEMBL3687    | <div><div></div></div> | 22 / 28                | Enzyme               |
| Arachidonate 15-lipoxygenase B (by homology)         | O15296     | ALOX15B   | CHEMBL2457    | <div><div></div></div> | 22 / 28                | Enzyme               |

SwissTargetPrediction report: Cycloartocarpin

Reference:  
Gleifer D., Michielin O. & Zoete V.  
Shaping the interaction landscape of  
bioactive molecules, *Bioinformatics*  
(2013) 29:3073-3079.

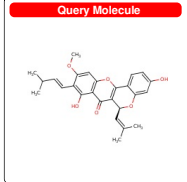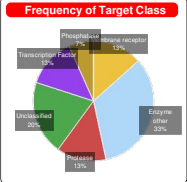

| Target                                                             | Uniprot ID | Gene code | ChEMBL ID     | Probability            | # sim. cmpds (3D / 2D) | Target Class         |
|--------------------------------------------------------------------|------------|-----------|---------------|------------------------|------------------------|----------------------|
| Adenosine receptor A1 (by homology)                                | P30542     | ADORA1    | CHEMBL226     | <div><div></div></div> | 103 / 3                | Membrane receptor    |
| Adenosine receptor A3                                              | P33765     | ADORA3    | CHEMBL256     | <div><div></div></div> | 62 / 6                 | Membrane receptor    |
| Prostaglandin G/H synthase 1                                       | P23219     | PTGS1     | CHEMBL221     | <div><div></div></div> | 20 / 2                 | Enzyme               |
| Prostaglandin G/H synthase 2                                       | P35354     | PTGS2     | CHEMBL230     | <div><div></div></div> | 20 / 2                 | Enzyme               |
| Beta-secretase 1                                                   | P56817     | BACE1     | CHEMBL4822    | <div><div></div></div> | 16 / 4                 | Aspartic Protease    |
| Beta-secretase 2 (by homology)                                     | Q9Y520     | BACE2     | CHEMBL2525    | <div><div></div></div> | 16 / 4                 | Aspartic Protease    |
| ATP-binding cassette sub-family G member 2                         | Q9UNQ0     | ABCG2     | CHEMBL5393    | <div><div></div></div> | 12 / 5                 | Unclassified         |
| Phospholipase A2                                                   | P04054     | PLA2G1B   | CHEMBL4426    | <div><div></div></div> | 4 / 1                  | Enzyme               |
| Microtubule-associated protein tau                                 | P10636     | MAPT      | CHEMBL1293224 | <div><div></div></div> | 571 / 4                | Unclassified         |
| cGMP-specific 3',5'-cyclic phosphodiesterase                       | Q76074     | PDE5A     | CHEMBL1827    | <div><div></div></div> | 53 / 7                 | Enzyme               |
| Dual 3',5'-cyclic-AMP and -GMP phosphodiesterase 11A (by homology) | Q9HCR9     | PDE11A    | CHEMBL2717    | <div><div></div></div> | 47 / 7                 | Enzyme               |
| Transcription factor p65                                           | Q04206     | RELA      | CHEMBL5533    | <div><div></div></div> | 2 / 2                  | Transcription Factor |
| Proto-oncogene c-Rel (by homology)                                 | Q04864     | REL       |               | <div><div></div></div> | 2 / 2                  | Transcription Factor |
| Scavenger receptor class B member 1 (by homology)                  | Q8WTV0     | SCARB1    | CHEMBL1914272 | <div><div></div></div> | 4 / 1                  | Unclassified         |
| Tyrosine-protein phosphatase non-receptor type 2 (by homology)     | P17706     | PTPN2     | CHEMBL3807    | <div><div></div></div> | 34 / 4                 | Tyr Phosphatase      |

SwissTargetPrediction report: D-Germacrene

Reference:  
Gleifer D., Michielin O. & Zoete V.  
Shaping the interaction landscape of  
bioactive molecules, *Bioinformatics*  
(2013) 29:3073-3079.

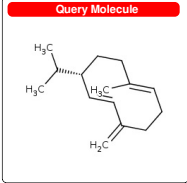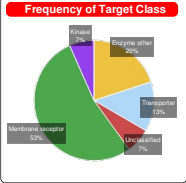

| Target                                              | Uniprot ID | Gene code | ChEMBL ID     | Probability            | # sim. cmpds (3D / 2D) | Target Class      |
|-----------------------------------------------------|------------|-----------|---------------|------------------------|------------------------|-------------------|
| Cytochrome P450 19A1                                | P11511     | CYP19A1   | CHEMBL1978    | <div><div></div></div> | 1 / 41                 | Enzyme            |
| Fatty-acid amide hydrolase 1                        | O00519     | FAAH      | CHEMBL2243    | <div><div></div></div> | 1 / 9                  | Enzyme            |
| Sodium-dependent noradrenaline transporter          | P23975     | SLC6A2    | CHEMBL222     | <div><div></div></div> | 11 / 1                 | Transporter       |
| Sodium-dependent dopamine transporter (by homology) | Q01959     | SLC6A3    | CHEMBL238     | <div><div></div></div> | 11 / 1                 | Transporter       |
| Microtubule-associated protein tau                  | P10636     | MAPT      | CHEMBL1293224 | <div><div></div></div> | 7 / 1                  | Unclassified      |
| Alpha-2A adrenergic receptor                        | P08913     | ADRA2A    | CHEMBL1867    | <div><div></div></div> | 43 / 1                 | Membrane receptor |
| Alpha-2B adrenergic receptor                        | P18089     | ADRA2B    | CHEMBL1942    | <div><div></div></div> | 43 / 1                 | Membrane receptor |
| Alpha-2C adrenergic receptor                        | P18825     | ADRA2C    | CHEMBL1916    | <div><div></div></div> | 43 / 1                 | Membrane receptor |
| Tyrosyl-DNA phosphodiesterase 1                     | Q9NUW8     | TDP1      | CHEMBL1075138 | <div><div></div></div> | 4 / 1                  | Enzyme            |
| Muscarinic acetylcholine receptor M2                | P08172     | CHRM2     | CHEMBL211     | <div><div></div></div> | 2 / 1                  | Membrane receptor |
| Muscarinic acetylcholine receptor M4                | P08173     | CHRM4     | CHEMBL1821    | <div><div></div></div> | 2 / 1                  | Membrane receptor |
| Muscarinic acetylcholine receptor M5                | P08912     | CHRM5     | CHEMBL2035    | <div><div></div></div> | 1 / 1                  | Membrane receptor |
| Muscarinic acetylcholine receptor M1                | P11229     | CHRM1     | CHEMBL216     | <div><div></div></div> | 2 / 1                  | Membrane receptor |
| Muscarinic acetylcholine receptor M3                | P20309     | CHRM3     | CHEMBL245     | <div><div></div></div> | 1 / 1                  | Membrane receptor |
| Mitogen-activated protein kinase 14                 | Q16539     | MAPK14    | CHEMBL260     | <div><div></div></div> | 2 / 1                  | Ser_Thr Kinase    |

SwissTargetPrediction report: Deguelin

Reference:  
Gleifer D., Michielin O. & Zoete V.  
Shaping the interaction landscape of  
bioactive molecules, *Bioinformatics*  
(2013) 29:3073-3079.

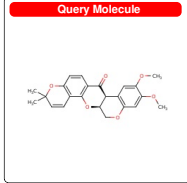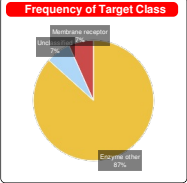

| Target                                 | Uniprot ID | Gene code | ChEMBL ID     | Probability            | # sim. cmpds (3D / 2D) | Target Class      |
|----------------------------------------|------------|-----------|---------------|------------------------|------------------------|-------------------|
| Tyrosyl-DNA phosphodiesterase 1        | Q9NUW8     | TDP1      | CHEMBL1075138 | <div><div></div></div> | 220 / 20               | Enzyme            |
| Ornithine decarboxylase                | P11926     | ODC1      | CHEMBL1869    | <div><div></div></div> | 1 / 10                 | Enzyme            |
| Antizyme inhibitor 1 (by homology)     | Q14977     | AZIN1     |               | <div><div></div></div> | 1 / 10                 | Enzyme            |
| Arginine decarboxylase (by homology)   | Q06A70     | ADC       |               | <div><div></div></div> | 1 / 10                 | Enzyme            |
| Microtubule-associated protein tau     | P10636     | MAPT      | CHEMBL1293224 | <div><div></div></div> | 1904 / 25              | Unclassified      |
| NADH-ubiquinone oxidoreductase chain 4 | P03905     | MT-ND4    | CHEMBL4499    | <div><div></div></div> | 5 / 5                  | Enzyme            |
| Cytochrome P450 2C19                   | P33261     | CYP2C19   | CHEMBL3622    | <div><div></div></div> | 2 / 1                  | Enzyme            |
| 5-hydroxytryptamine receptor 6         | P50406     | HTR6      | CHEMBL3371    | <div><div></div></div> | 9 / 1                  | Membrane receptor |
| Cytochrome P450 2E1 (by homology)      | P05181     | CYP2E1    | CHEMBL5281    | <div><div></div></div> | 2 / 1                  | Enzyme            |
| Cytochrome P450 2C8 (by homology)      | P10632     | CYP2C8    | CHEMBL3721    | <div><div></div></div> | 2 / 1                  | Enzyme            |
| Cytochrome P450 2A6 (by homology)      | P11509     | CYP2A6    | CHEMBL5282    | <div><div></div></div> | 2 / 1                  | Enzyme            |
| Cytochrome P450 2C9 (by homology)      | P11712     | CYP2C9    | CHEMBL3397    | <div><div></div></div> | 2 / 1                  | Enzyme            |
| Cytochrome P450 2B6 (by homology)      | P20813     | CYP2B6    | CHEMBL4729    | <div><div></div></div> | 2 / 1                  | Enzyme            |
| Cytochrome P450 2A7 (by homology)      | P20853     | CYP2A7    |               | <div><div></div></div> | 2 / 1                  | Enzyme            |
| Cytochrome P450 2F1 (by homology)      | P24903     | CYP2F1    |               | <div><div></div></div> | 2 / 1                  | Enzyme            |

| Target                                 | Uniprot ID | Gene Code | ChEMBL ID     | By homology | Probability | Number of sim. cmpds (3D) | Number of sim. cmpds (0D) | Target Class      |
|----------------------------------------|------------|-----------|---------------|-------------|-------------|---------------------------|---------------------------|-------------------|
| Tyrosyl-DNA phosphodiesterase 1        | Q9NUW8     | TDP1      | CHEMBL1075138 | No          | 0.92        | 220                       | 20                        | Enzyme            |
| Ornithine decarboxylase                | P11926     | ODC1      | CHEMBL1869    | No          | 0.86        | 1                         | 10                        | Enzyme            |
| Antizyme inhibitor 1                   | Q14977     | AZIN1     |               | Yes         | 0.86        | 1                         | 10                        | Enzyme            |
| Arginine decarboxylase                 | Q06A70     | ADC       |               | Yes         | 0.86        | 1                         | 10                        | Enzyme            |
| Microtubule-associated protein tau     | P10636     | MAPT      | CHEMBL1293224 | No          | 0.60        | 1904                      | 25                        | Unclassified      |
| NADH-ubiquinone oxidoreductase chain 4 | P03905     | MT-ND4    | CHEMBL4499    | No          | 0.49        | 5                         | 5                         | Enzyme            |
| Cytochrome P450 2C19                   | P33261     | CYP2C19   | CHEMBL3622    | No          | 0.49        | 2                         | 1                         | Enzyme            |
| 5-hydroxytryptamine receptor 6         | P50406     | HTR6      | CHEMBL3371    | No          | 0.49        | 9                         | 1                         | Membrane receptor |
| Cytochrome P450 2E1                    | P05181     | CYP2E1    | CHEMBL5281    | Yes         | 0.49        | 2                         | 1                         | Enzyme            |
| Cytochrome P450 2C8                    | P10632     | CYP2C8    | CHEMBL3721    | Yes         | 0.49        | 2                         | 1                         | Enzyme            |
| Cytochrome P450 2A6                    | P11509     | CYP2A6    | CHEMBL5282    | Yes         | 0.49        | 2                         | 1                         | Enzyme            |
| Cytochrome P450 2C9                    | P11712     | CYP2C9    | CHEMBL3397    | Yes         | 0.49        | 2                         | 1                         | Enzyme            |
| Cytochrome P450 2B6 (by homology)      | P20813     | CYP2B6    | CHEMBL4729    | Yes         | 0.49        | 2                         | 1                         | Enzyme            |
| Cytochrome P450 2A7 (by homology)      | P20853     | CYP2A7    |               | Yes         | 0.49        | 2                         | 1                         | Enzyme            |
| Cytochrome P450 2F1                    | P24903     | CYP2F1    |               | Yes         | 0.49        | 2                         | 1                         | Enzyme            |

SwissTargetPrediction report: Escopoletin

Reference:  
Gleifer D., Michielin O. & Zoete V.  
Shaping the interaction landscape of  
bioactive molecules, *Bioinformatics*  
(2013) 29:3073-3079.

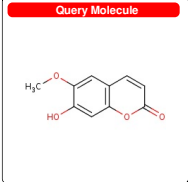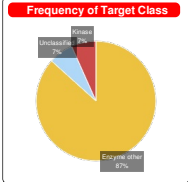

| Target                                                                      | Uniprot ID | Gene code | ChEMBL ID     | Probability            | # sim. cmpds (3D / 2D) | Target Class       |
|-----------------------------------------------------------------------------|------------|-----------|---------------|------------------------|------------------------|--------------------|
| FAD-linked sulphydryl oxidase ALR                                           | P55789     | GFER      | CHEMBL1741189 | <div><div></div></div> | 6 / 6                  | Enzyme             |
| Carbonic anhydrase 9                                                        | Q16790     | CA9       | CHEMBL3594    | <div><div></div></div> | 5 / 47                 | Enzyme             |
| Carbonic anhydrase 1                                                        | P00915     | CA1       | CHEMBL261     | <div><div></div></div> | 25 / 28                | Enzyme             |
| Carbonic anhydrase 2 (by homology)                                          | P00918     | CA2       | CHEMBL205     | <div><div></div></div> | 25 / 28                | Enzyme             |
| Carbonic anhydrase 3 (by homology)                                          | P07451     | CA3       | CHEMBL2885    | <div><div></div></div> | 25 / 28                | Enzyme             |
| Carbonic anhydrase 5A, mitochondrial                                        | P35218     | CA5A      | CHEMBL4789    | <div><div></div></div> | 25 / 28                | Enzyme             |
| Carbonic anhydrase 7                                                        | P43166     | CA7       | CHEMBL2326    | <div><div></div></div> | 25 / 28                | Enzyme             |
| Carbonic anhydrase 13 (by homology)                                         | Q8N1Q1     | CA13      | CHEMBL3912    | <div><div></div></div> | 25 / 28                | Enzyme             |
| Carbonic anhydrase 5B, mitochondrial                                        | Q9Y2D0     | CA5B      | CHEMBL3969    | <div><div></div></div> | 25 / 28                | Enzyme             |
| Microtubule-associated protein tau                                          | P10636     | MAPT      | CHEMBL1293224 | <div><div></div></div> | 10 / 42                | Unclassified       |
| Carbonic anhydrase 12                                                       | Q43570     | CA12      | CHEMBL3242    | <div><div></div></div> | 3 / 30                 | Enzyme             |
| Carbonic anhydrase 14                                                       | Q9ULX7     | CA14      | CHEMBL3510    | <div><div></div></div> | 3 / 30                 | Enzyme             |
| Carbonic anhydrase 4                                                        | P22748     | CA4       | CHEMBL3729    | <div><div></div></div> | 11 / 7                 | Enzyme             |
| Dual specificity tyrosine-phosphorylation-regulated kinase 1A (by homology) | Q13627     | DYRK1A    | CHEMBL2292    | <div><div></div></div> | 5 / 24                 | Ser_Thr_Tyr Kinase |
| Carbonic anhydrase 6                                                        | P23280     | CA6       | CHEMBL3025    | <div><div></div></div> | 2 / 8                  | Enzyme             |

SwissTargetPrediction report: Fenchone

Reference:  
Gleifer D., Michielin O. & Zoete V.  
Shaping the interaction landscape of  
bioactive molecules, *Bioinformatics*  
(2013) 29:3073-3079.

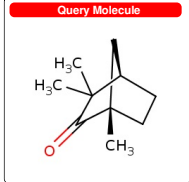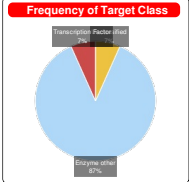

| Target                                             | Uniprot ID | Gene code | ChEMBL ID     | Probability            | # sim. cmpds (3D / 2D) | Target Class         |
|----------------------------------------------------|------------|-----------|---------------|------------------------|------------------------|----------------------|
| Microtubule-associated protein tau                 | P10636     | MAPT      | CHEMBL1293224 | <div><div></div></div> | 5 / 3                  | Unclassified         |
| Cytochrome P450 19A1                               | P11511     | CYP19A1   | CHEMBL1978    | <div><div></div></div> | 14 / 30                | Enzyme               |
| Carbonic anhydrase 1                               | P00915     | CA1       | CHEMBL261     | <div><div></div></div> | 2 / 2                  | Enzyme               |
| Carbonic anhydrase 2                               | P00918     | CA2       | CHEMBL205     | <div><div></div></div> | 2 / 2                  | Enzyme               |
| Carbonic anhydrase 4                               | P22748     | CA4       | CHEMBL3729    | <div><div></div></div> | 1 / 1                  | Enzyme               |
| Carbonic anhydrase 3 (by homology)                 | P07451     | CA3       | CHEMBL2885    | <div><div></div></div> | 2 / 2                  | Enzyme               |
| Carbonic anhydrase 5A, mitochondrial (by homology) | P35218     | CA5A      | CHEMBL4789    | <div><div></div></div> | 2 / 2                  | Enzyme               |
| Carbonic anhydrase 7 (by homology)                 | P43166     | CA7       | CHEMBL2326    | <div><div></div></div> | 2 / 2                  | Enzyme               |
| Carbonic anhydrase 13 (by homology)                | Q8N1Q1     | CA13      | CHEMBL3912    | <div><div></div></div> | 2 / 2                  | Enzyme               |
| Carbonic anhydrase 5B, mitochondrial (by homology) | Q9Y2D0     | CA5B      | CHEMBL3969    | <div><div></div></div> | 2 / 2                  | Enzyme               |
| Androgen receptor                                  | P10275     | AR        | CHEMBL1871    | <div><div></div></div> | 5 / 9                  | Transcription Factor |
| Tyrosyl-DNA phosphodiesterase 1                    | Q9NUW8     | TDP1      | CHEMBL1075138 | <div><div></div></div> | 2 / 4                  | Enzyme               |
| Testosterone 17-beta-dehydrogenase 3               | P37058     | HSD17B3   | CHEMBL4234    | <div><div></div></div> | 2 / 11                 | Enzyme               |
| Estradiol 17-beta-dehydrogenase 12 (by homology)   | Q53GQ0     | HSD17B12  | CHEMBL5998    | <div><div></div></div> | 2 / 11                 | Enzyme               |
| Corticosteroid 11-beta-dehydrogenase isozyme 1     | P28845     | HSD11B1   | CHEMBL4235    | <div><div></div></div> | 13 / 3                 | Enzyme               |

SwissTargetPrediction report: Morusin

Reference:  
Gleifer D., Michielin O. & Zoete V.  
Shaping the interaction landscape of  
bioactive molecules, *Bioinformatics*  
(2013) 29:3073-3079.

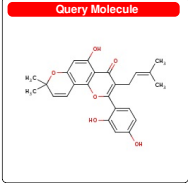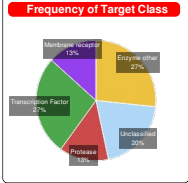

| Target                                                             | Uniprot ID | Gene code | ChEMBL ID     | Probability            | # sim. cmpds (3D / 2D) | Target Class         |
|--------------------------------------------------------------------|------------|-----------|---------------|------------------------|------------------------|----------------------|
| Prostaglandin G/H synthase 1 (by homology)                         | P23219     | PTGS1     | CHEMBL221     | <div><div></div></div> | 17 / 1                 | Enzyme               |
| Prostaglandin G/H synthase 2                                       | P35354     | PTGS2     | CHEMBL230     | <div><div></div></div> | 17 / 1                 | Enzyme               |
| ATP-binding cassette sub-family G member 2                         | Q9JUNQ     | ABCG2     | CHEMBL5393    | <div><div></div></div> | 18 / 3                 | Unclassified         |
| Beta-secretase 1                                                   | P56817     | BACE1     | CHEMBL4822    | <div><div></div></div> | 21 / 8                 | Aspartic Protease    |
| Beta-secretase 2 (by homology)                                     | Q9Y5Z0     | BACE2     | CHEMBL2525    | <div><div></div></div> | 21 / 8                 | Aspartic Protease    |
| Nuclear factor NF-kappa-B p50 subunit                              | P19838     | NFKB1     | CHEMBL3251    | <div><div></div></div> | 2 / 1                  | Transcription Factor |
| Transcription factor p65                                           | Q04206     | RELA      | CHEMBL5533    | <div><div></div></div> | 3 / 2                  | Transcription Factor |
| Nuclear factor NF-kappa-B p100 subunit (by homology)               | Q00653     | NFKB2     | CHEMBL3003    | <div><div></div></div> | 2 / 1                  | Transcription Factor |
| Proto-oncogene c-Rel (by homology)                                 | Q04864     | REL       |               | <div><div></div></div> | 3 / 2                  | Transcription Factor |
| Adenosine receptor A1 (by homology)                                | P30542     | ADORA1    | CHEMBL226     | <div><div></div></div> | 64 / 1                 | Membrane receptor    |
| Adenosine receptor A3                                              | P33765     | ADORA3    | CHEMBL256     | <div><div></div></div> | 33 / 3                 | Membrane receptor    |
| Microtubule-associated protein tau                                 | P10636     | MAPT      | CHEMBL1293224 | <div><div></div></div> | 326 / 3                | Unclassified         |
| Scavenger receptor class B member 1                                | Q8WTW0     | SCARB1    | CHEMBL1914272 | <div><div></div></div> | 2 / 1                  | Unclassified         |
| cGMP-specific 3',5'-cyclic phosphodiesterase                       | Q76074     | PDE5A     | CHEMBL1827    | <div><div></div></div> | 91 / 7                 | Enzyme               |
| Dual 3',5'-cyclic-AMP and -GMP phosphodiesterase 11A (by homology) | Q9HCR9     | PDE11A    | CHEMBL2717    | <div><div></div></div> | 80 / 7                 | Enzyme               |

SwissTargetPrediction report: Rotenone

Reference:  
Gleifer D., Michielin O. & Zoete V.  
Shaping the interaction landscape of  
bioactive molecules, *Bioinformatics*  
(2013) 29:3073-3079.

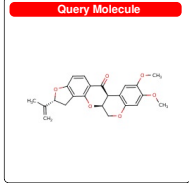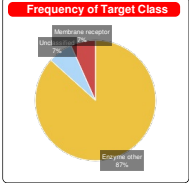

| Target                                 | Uniprot ID | Gene code | ChEMBL ID     | Probability            | # sim. cmpds (3D / 2D) | Target Class      |
|----------------------------------------|------------|-----------|---------------|------------------------|------------------------|-------------------|
| NADH-ubiquinone oxidoreductase chain 4 | P03905     | MT-ND4    | CHEMBL4499    | <div><div></div></div> | 5 / 5                  | Enzyme            |
| Microtubule-associated protein tau     | P10636     | MAPT      | CHEMBL1293224 | <div><div></div></div> | 662 / 27               | Unclassified      |
| Cytochrome P450 2C19                   | P33261     | CYP2C19   | CHEMBL3622    | <div><div></div></div> | 1 / 1                  | Enzyme            |
| 5-hydroxytryptamine receptor 6         | P50406     | HTR6      | CHEMBL3371    | <div><div></div></div> | 2 / 1                  | Membrane receptor |
| Tyrosyl-DNA phosphodiesterase 1        | Q9NUW8     | TDP1      | CHEMBL1075138 | <div><div></div></div> | 68 / 20                | Enzyme            |
| Cytochrome P450 2E1 (by homology)      | P05181     | CYP2E1    | CHEMBL5281    | <div><div></div></div> | 1 / 1                  | Enzyme            |
| Cytochrome P450 2C8 (by homology)      | P10632     | CYP2C8    | CHEMBL3721    | <div><div></div></div> | 1 / 1                  | Enzyme            |
| Cytochrome P450 2A6 (by homology)      | P11509     | CYP2A6    | CHEMBL5282    | <div><div></div></div> | 1 / 1                  | Enzyme            |
| Cytochrome P450 2C9 (by homology)      | P11712     | CYP2C9    | CHEMBL3397    | <div><div></div></div> | 1 / 1                  | Enzyme            |
| Cytochrome P450 2B6 (by homology)      | P20813     | CYP2B6    | CHEMBL4729    | <div><div></div></div> | 1 / 1                  | Enzyme            |
| Cytochrome P450 2A7 (by homology)      | P20853     | CYP2A7    |               | <div><div></div></div> | 1 / 1                  | Enzyme            |
| Cytochrome P450 2F1 (by homology)      | P24903     | CYP2F1    |               | <div><div></div></div> | 1 / 1                  | Enzyme            |
| Cytochrome P450 2C18 (by homology)     | P33260     | CYP2C18   | CHEMBL2408    | <div><div></div></div> | 1 / 1                  | Enzyme            |
| Cytochrome P450 2A13 (by homology)     | Q16696     | CYP2A13   |               | <div><div></div></div> | 1 / 1                  | Enzyme            |
| Cytochrome P450 19A1                   | P11511     | CYP19A1   | CHEMBL1978    | <div><div></div></div> | 22 / 34                | Enzyme            |
