# Supplementary material for: In Silico Research of New Therapeutics Rotenoids Derivatives against Leishmania amazonensis Infection
Source: MDPI journal article supplement (doi:10.3390/biology11010133), 2022-01-14
Supplement: s1 [file s1]

| TOP | LIGAND   | SMILES                                                                                    | 5XTD AFFINITY<br>(KCAL/MOL) | ODC AFFINITY<br>(KCAL/MOL) | RATIO      |
|-----|----------|-------------------------------------------------------------------------------------------|-----------------------------|----------------------------|------------|
| 1   | 12.11_14 | <chem>O1C2C(c3c(OC2)cc(OC)c(OC)c3)(C(=O)c2c1c1c(OC(C=C1)(C)C)cc2)CCCC(=O)N</chem>         | -7,203                      | -10,646                    | 1,47799528 |
| 2   | 12.6_7   | <chem>O1C2C(c3c(OC2)cc(OC)c(OC)c3)(C(=O)c2c1c1c(OC(C=C1)(C)C)cc2)C(=O)NCl</chem>          | -7,129                      | -10,479                    | 1,46991163 |
| 3   | 12.6_17  | <chem>O1C2C(c3c(OC2)cc(OC)c(OC)c3)(C(=O)c2c1c1c(OC(C=C1)(C)C)cc2)C(=O)NC(F)(F)F</chem>    | -7,233                      | -10,551                    | 1,45873082 |
| 4   | 12.6_1   | <chem>O1C2C(c3c(OC2)cc(OC)c(OC)c3)(C(=O)c2c1c1c(OC(C=C1)(C)C)cc2)C(=O)NC</chem>           | -7,101                      | -10,335                    | 1,45542881 |
| 5   | 12.6_14  | <chem>O1C2C(c3c(OC2)cc(OC)c(OC)c3)(C(=O)c2c1c1c(OC(C=C1)(C)C)cc2)C(=O)NC(=O)N</chem>      | -7,059                      | -10,232                    | 1,4494971  |
| 6   | 6.3_10   | <chem>O1C2C(c3c(OC2)cc(OC)c(OOCO)c3)C(=O)c2c1c1c(OC(C=C1)(C)C)cc2</chem>                  | -6,816                      | -9,873                     | 1,44850352 |
| 7   | 12.14_19 | <chem>O1C2C(c3c(OC2)cc(OC)c(OC)c3)(C(=O)c2c1c1c(OC(C=C1)(C)C)cc2)NCCC(=O)O</chem>         | -6,961                      | -10,079                    | 1,44792415 |
| 8   | 12.19_2  | <chem>O1C2C(c3c(OC2)cc(OC)c(OC)c3)(C(=O)c2c1c1c(OC(C=C1)(C)C)cc2)c1cccc(c1)O</chem>       | -7,6                        | -11                        | 1,44736842 |
| 9   | 12.16_6  | <chem>O1C2C(c3c(OC2)cc(OC)c(OC)c3)(C(=O)c2c1c1c(OC(C=C1)(C)C)cc2)c1c(cccc1)OC</chem>      | -7,778                      | -11,256                    | 1,44715865 |
| 10  | 12.9_13  | <chem>O1C2C(c3c(OC2)cc(OC)c(OC)c3)(C(=O)c2c1c1c(OC(C=C1)(C)C)cc2)C(=O)OCc1cccc1</chem>    | -7,733                      | -11,182                    | 1,4460106  |
| 11  | 9.20_1   | <chem>O1C2C(c3c(OC2c2ccc(CC)cc2)cc(OC)c(OC)c3)C(=O)c2c1c1c(OC(C=C1)(C)C)cc2</chem>        | -7,823                      | -11,3                      | 1,44445865 |
| 12  | 12.11_19 | <chem>O1C2C(c3c(OC2)cc(OC)c(OC)c3)(C(=O)c2c1c1c(OC(C=C1)(C)C)cc2)CCCCC(=O)O</chem>        | -7,243                      | -10,459                    | 1,44401491 |
| 13  | 12.19_19 | <chem>O1C2C(c3c(OC2)cc(OC)c(OC)c3)(C(=O)c2c1c1c(OC(C=C1)(C)C)cc2)c1cccc(c1)CC(=O)O</chem> | -7,561                      | -10,907                    | 1,44253406 |
| 14  | 12.6_9   | <chem>O1C2C(c3c(OC2)cc(OC)c(OC)c3)(C(=O)c2c1c1c(OC(C=C1)(C)C)cc2)C(=O)NCC</chem>          | -7,176                      | -10,342                    | 1,44119287 |
| 15  | 12.19_16 | <chem>O1C2C(c3c(OC2)cc(OC)c(OC)c3)(C(=O)c2c1c1c(OC(C=C1)(C)C)cc2)c1cccc(c1)C#N</chem>     | -7,568                      | -10,872                    | 1,43657505 |
| 16  | 12.11_8  | <chem>O1C2C(c3c(OC2)cc(OC)c(OC)c3)(C(=O)c2c1c1c(OC(C=C1)(C)C)cc2)CCCF</chem>              | -7,311                      | -10,499                    | 1,43605526 |
| 17  | 12.5_2   | <chem>O1C2C(c3c(OC2)cc(OC)c(OC)c3)(C(=O)c2c1c1c(OC(C=C1)(C)C)cc2)c1ccc(cc1)O</chem>       | -7,655                      | -10,991                    | 1,4357936  |
| 18  | 6.18_19  | <chem>O1C2C(c3c(OC2)cc(OC)c(OC(C(=O)O)CC(=O)O)c3)C(=O)c2c1c1c(OC(C=C1)(C)C)cc2</chem>     | -6,751                      | -9,693                     | 1,43578729 |
| 19  | 12.11_7  | <chem>O1C2C(c3c(OC2)cc(OC)c(OC)c3)(C(=O)c2c1c1c(OC(C=C1)(C)C)cc2)CCCCl</chem>             | -7,37                       | -10,569                    | 1,43405699 |
| 20  | 9.20_16  | <chem>O1C2C(c3c(OC2c2ccc(CC#N)cc2)cc(OC)c(OC)c3)C(=O)c2c1c1c(OC(C=C1)(C)C)cc2</chem>      | -7,774                      | -11,14                     | 1,43298173 |
| 21  | 9.5_1    | <chem>O1C2C(c3c(OC2c2ccc(cc2)C)cc(OC)c(OC)c3)C(=O)c2c1c1c(OC(C=C1)(C)C)cc2</chem>         | -7,757                      | -11,111                    | 1,43238365 |
| 22  | 12.19_8  | <chem>O1C2C(c3c(OC2)cc(OC)c(OC)c3)(C(=O)c2c1c1c(OC(C=C1)(C)C)cc2)c1cccc(c1)F</chem>       | -7,746                      | -11,085                    | 1,43106119 |
| 23  | 12.18_2  | <chem>O1C2C(c3c(OC2)cc(OC)c(OC)c3)(C(=O)c2c1c1c(OC(C=C1)(C)C)cc2)C(C(=O)O)O</chem>        | -6,845                      | -9,793                     | 1,43067933 |
| 24  | 12.19_7  | <chem>O1C2C(c3c(OC2)cc(OC)c(OC)c3)(C(=O)c2c1c1c(OC(C=C1)(C)C)cc2)c1cccc(c1)Cl</chem>      | -7,825                      | -11,186                    | 1,42952077 |
| 25  | 6.12_10  | <chem>O1C2C(c3c(OC2)cc(OC)c(OCCO)c3)C(=O)c2c1c1c(OC(C=C1)(C)C)cc2</chem>                  | -7,083                      | -10,123                    | 1,42919667 |
